# Supplementary material for: Inhibiting protein biofouling using graphene oxide in droplet-based microfluidic microsystems
Source: Royal Society of Chemistry journal article supplement (doi:10.1039/c2lc21279j), 2012-01-01
Supplement: c2lc21279j.pdf [file c2lc21279j.pdf]

## Supporting Information

### Inhibiting protein biofouling using graphene oxide in droplet-based microfluidic microsystems

Guillaume Perry,<sup>a,b</sup> Vincent Thomy,<sup>a,\*</sup> Manash R. Das,<sup>c</sup> Yannick Coffinier<sup>b</sup> and Rabah Boukherroub<sup>b,\*</sup>

#### Supplementary Methods I: Experimental Methods

On a glass wafer, called base, cleaned by ultrasonication in acetone and isopropyl alcohol baths, 20-nm evaporated nickel electrodes are patterned by photolithography. Electrode patterns are developed through wet etching ( $\text{H}_2\text{O}/\text{HNO}_3$ , 3:1 v/v, 1min). The photoresist is removed with acetone bath. Then the wafer is rinsed with isopropyl alcohol, deionized water and dried under a stream of nitrogen. The wafer is coated by a SU-8 layer (2  $\mu\text{m}$  thick as dielectric) and by Cytop® (30 nm thick) for the hydrophobic layer, both by spin-coating. The hydrophobic counter electrode consists of a doped silicon wafer coated by a 30 nm thick Cytop® layer. The contact angle and contact angle hysteresis with deionized water are  $115^\circ$  and  $11^\circ$ , respectively.

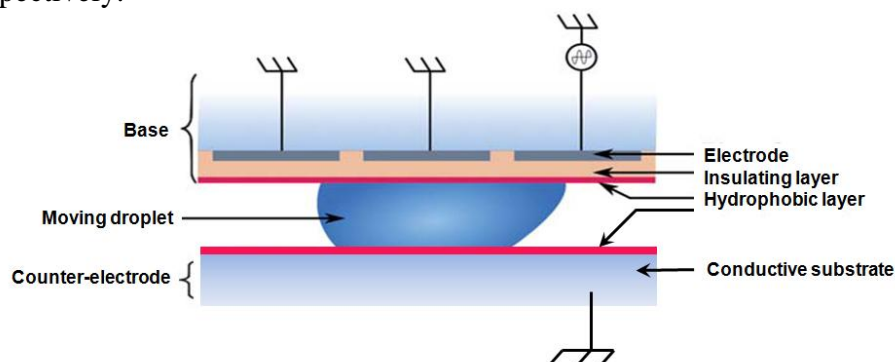

**Figure S1:** Set up of the electrowetting device.

Each electrode of  $1\text{mm}^2$  on the EWOD device is driven by a home-made LabView® program through an electric relay card. The electric relay card switches every second on the electrodes, the applied voltage is provided by a signal generator (33120A, Hewlett-Packard®) coupled to a 50dBm high-voltage amplifier (2340, Tegam). The applied voltage is a squared signal at 1kHz and at  $V_{\text{TRMS}}=100\text{V}$ .

## Supplementary information: Results and discussion

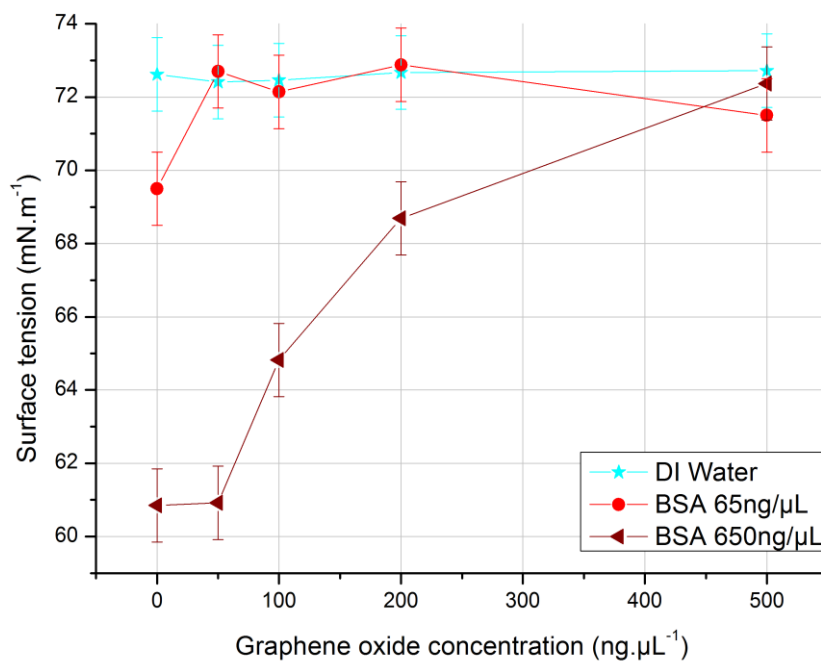

**Figure S2:** Surface tension measured for different concentrations of BSA and graphene oxide

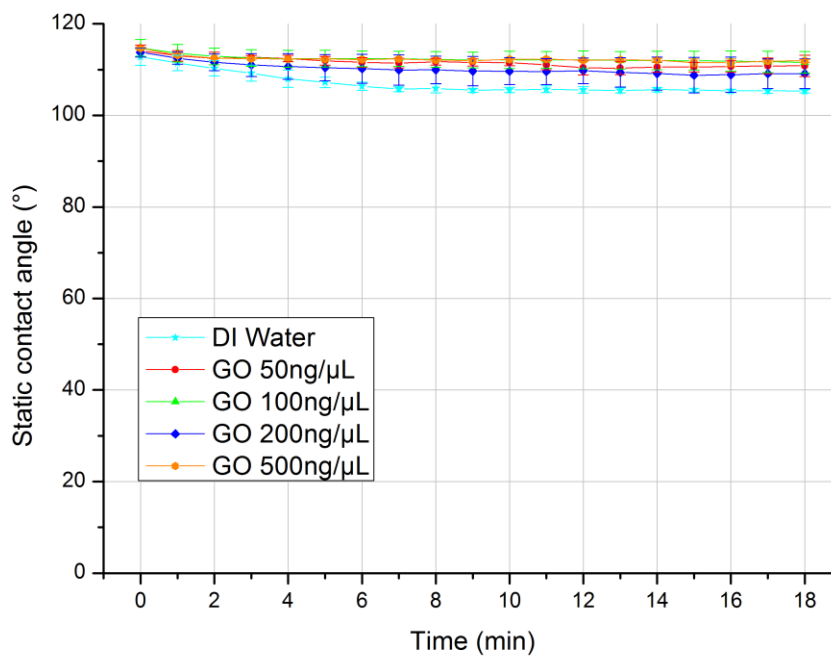

**Figure S3:** Static contact angle vs time during evaporation of a 2 μL droplet containing only GO at 50, 100, 200 and 500 ng/μL.

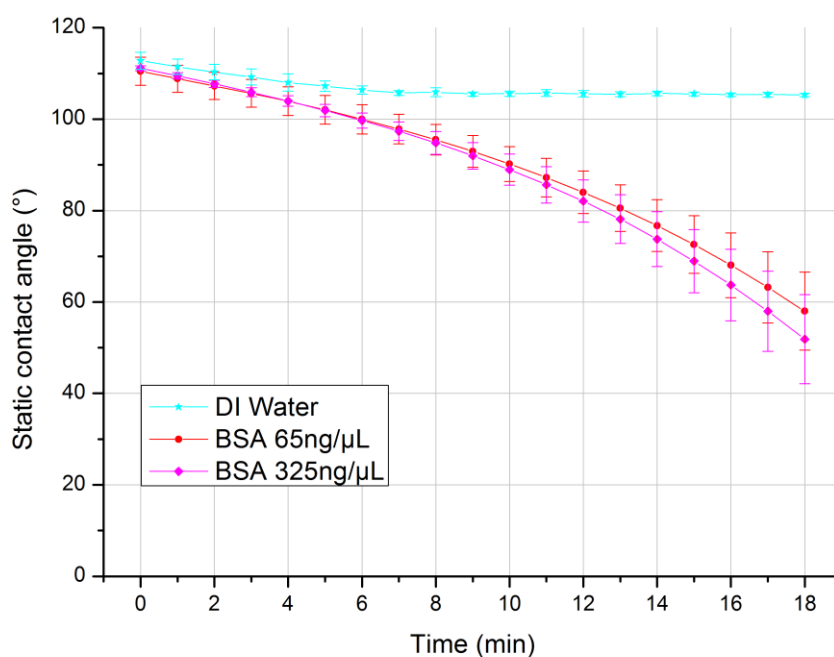

**Figure S4:** Static contact angle vs time during evaporation of a 2  $\mu\text{L}$  water droplet without and with BSA at 65 and 325  $\text{ng}/\mu\text{L}$  .

### Videos

V1: Evaporation of a 2  $\mu\text{L}$  droplet containing proteins (BSA, 65  $\text{ng}/\mu\text{L}$ ) + GO (100  $\text{ng}/\mu\text{L}$ )

<https://bigfile.univ-lille1.fr:443/get?k=HO8BysHLLq1VL5ecmk7>

V2: Evaporation of a 2  $\mu\text{L}$  droplet containing proteins (BSA, 195  $\text{ng}/\mu\text{L}$ ) + GO (100  $\text{ng}/\mu\text{L}$ )

<https://bigfile.univ-lille1.fr:443/get?k=zSsiGLcWov4wAAc2DPN>

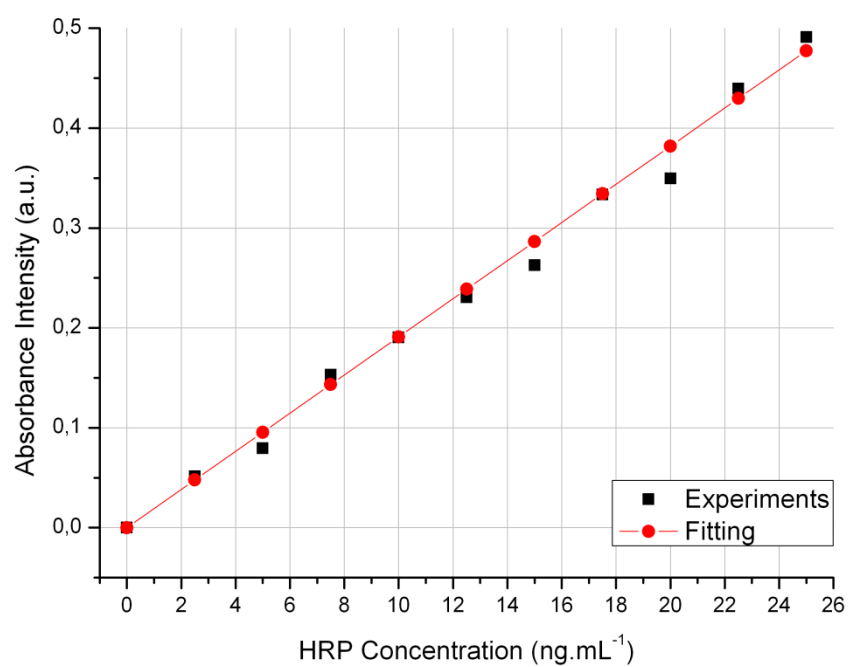

Figure S5: Calibration Curve of HRP in aqueous solution with ABTS (3.6 mM) and H<sub>2</sub>O<sub>2</sub> (50  $\mu$ M)  $R^2=0.991$
